# Supplementary material
Source: PubMed Central journal article supplement (PMC6260937)
Supplement: NIHMS983298-supplement-S1.pdf [file NIHMS983298-supplement-S1.pdf]

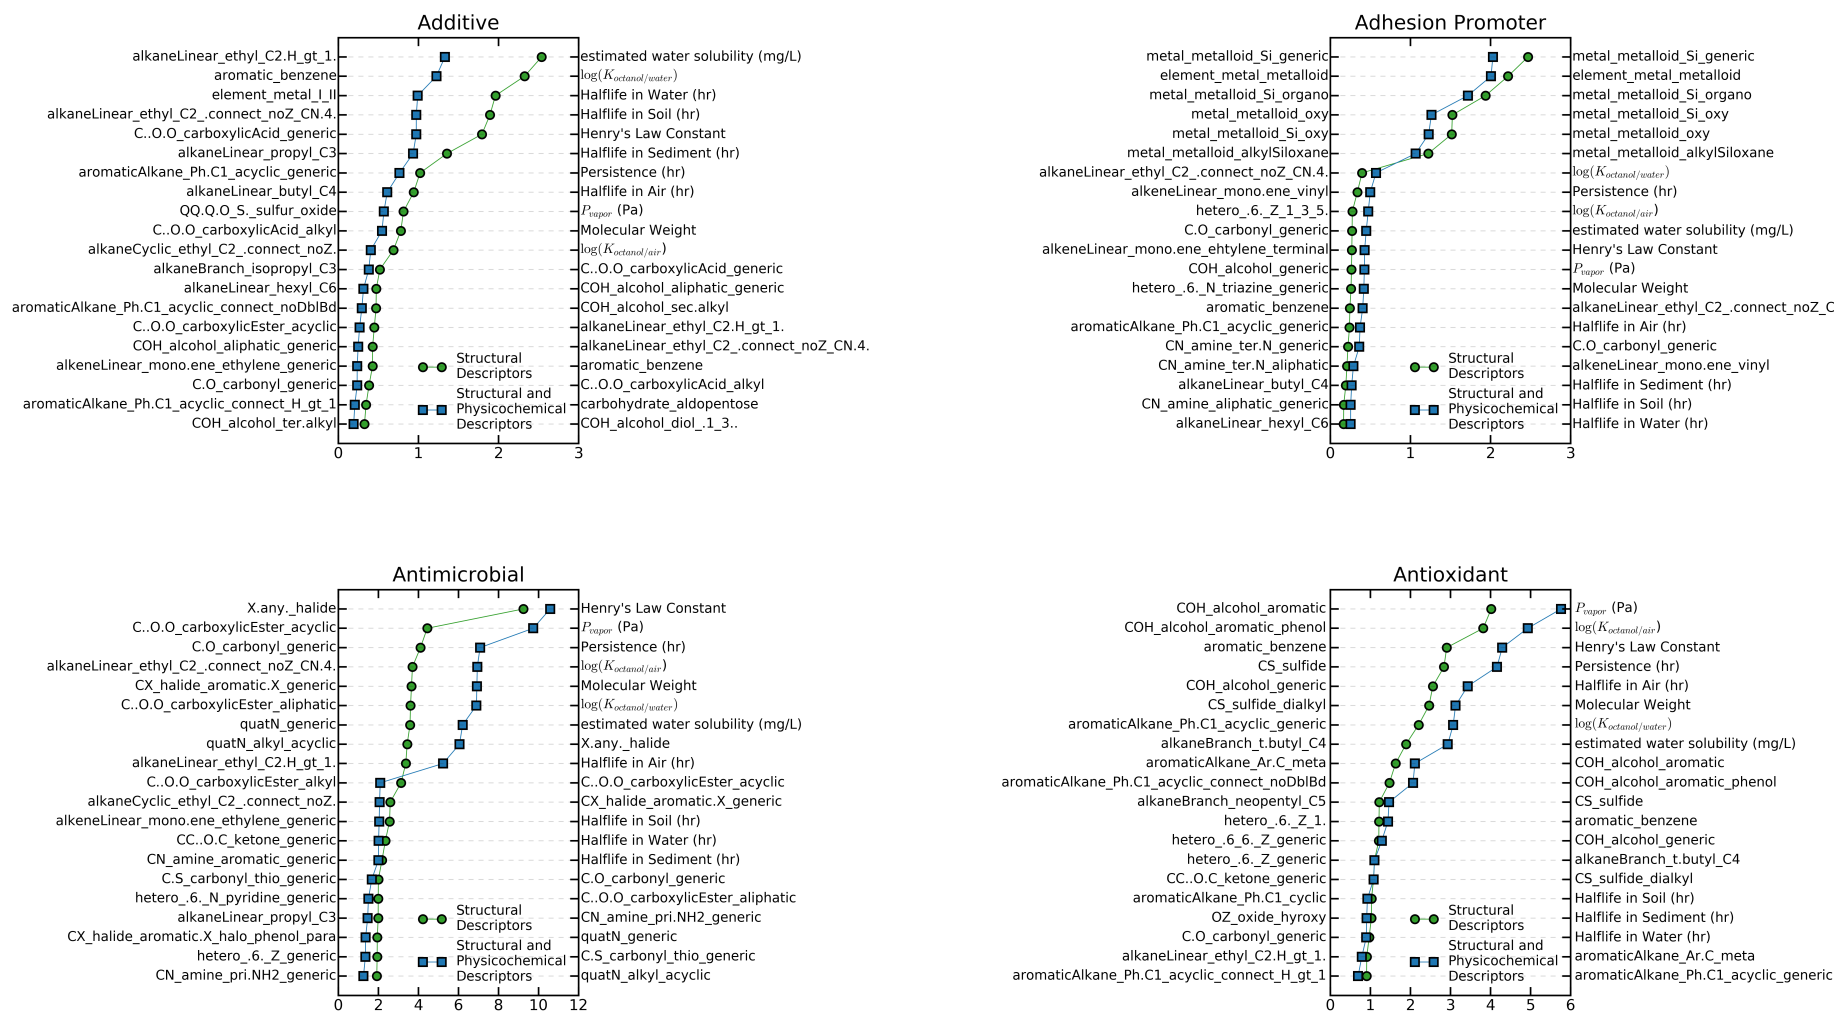

SI Figure 1: Most important variables for additive, adhesion promoter, antimicrobial, and antioxidant QSUR models.

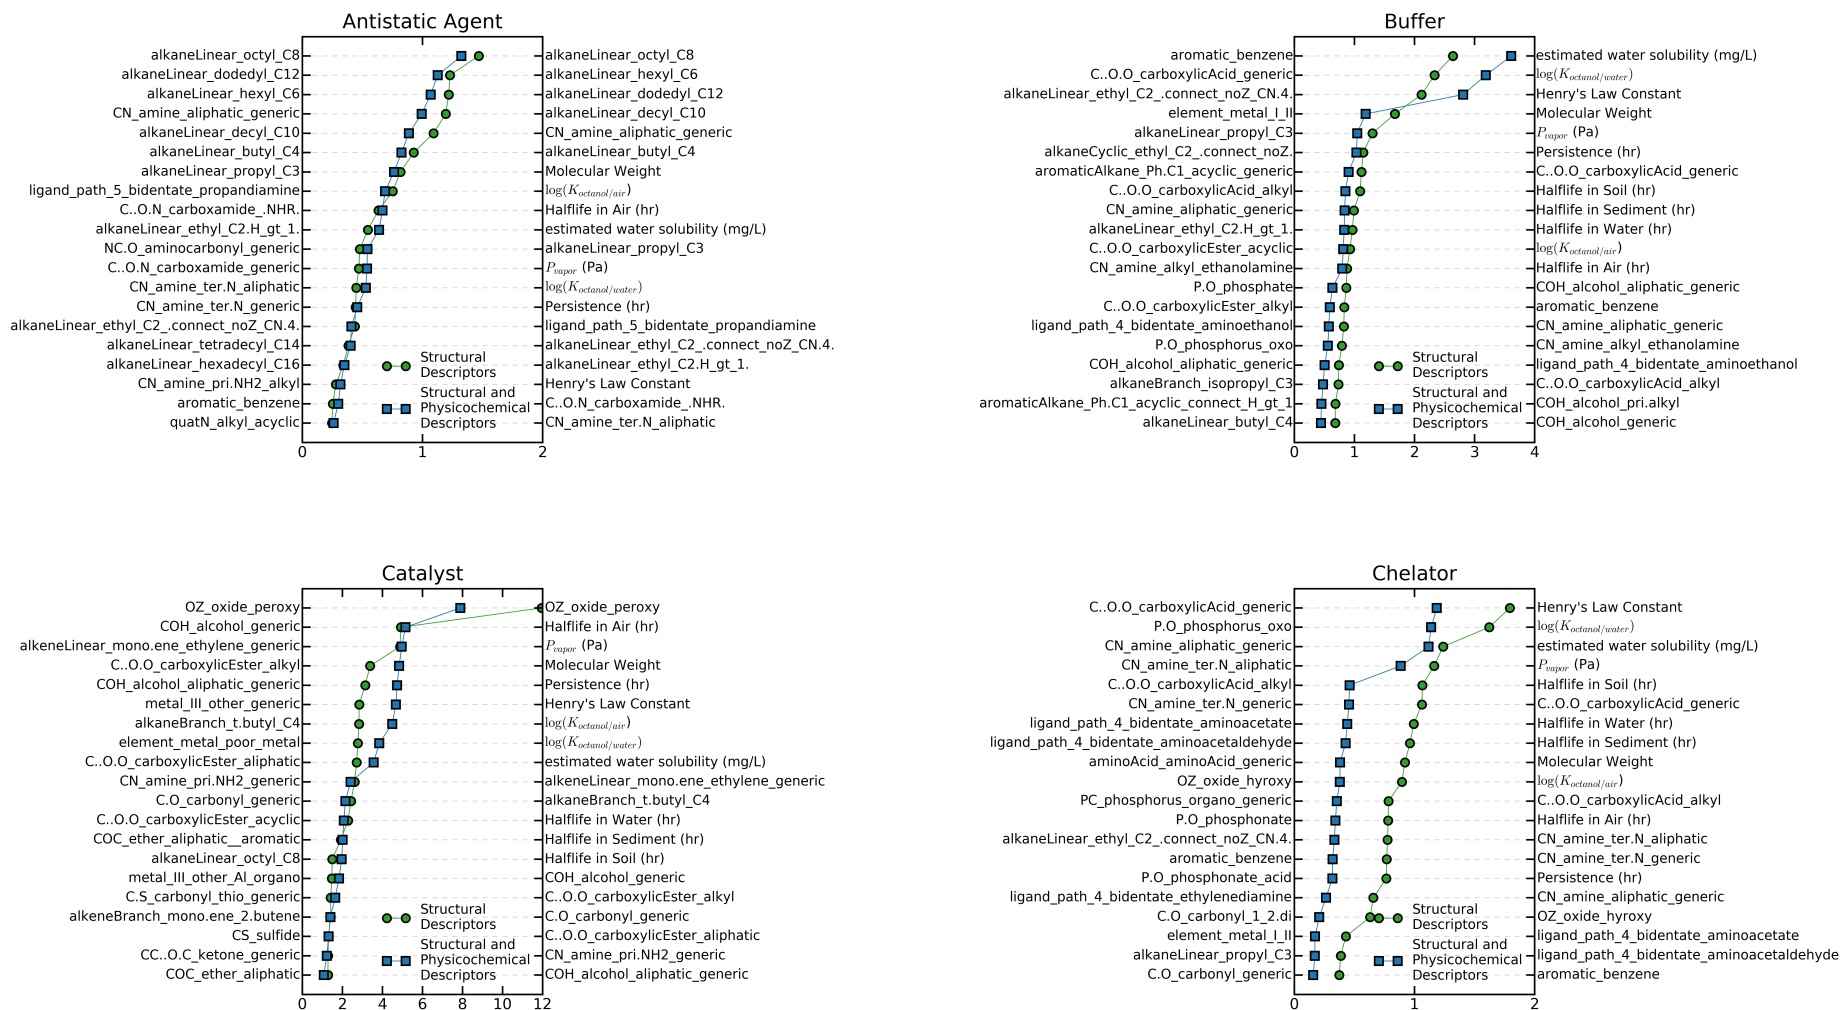

SI Figure 2: Most important variables for antistatic agent, buffer, catalyst, and chelator QSUR models.

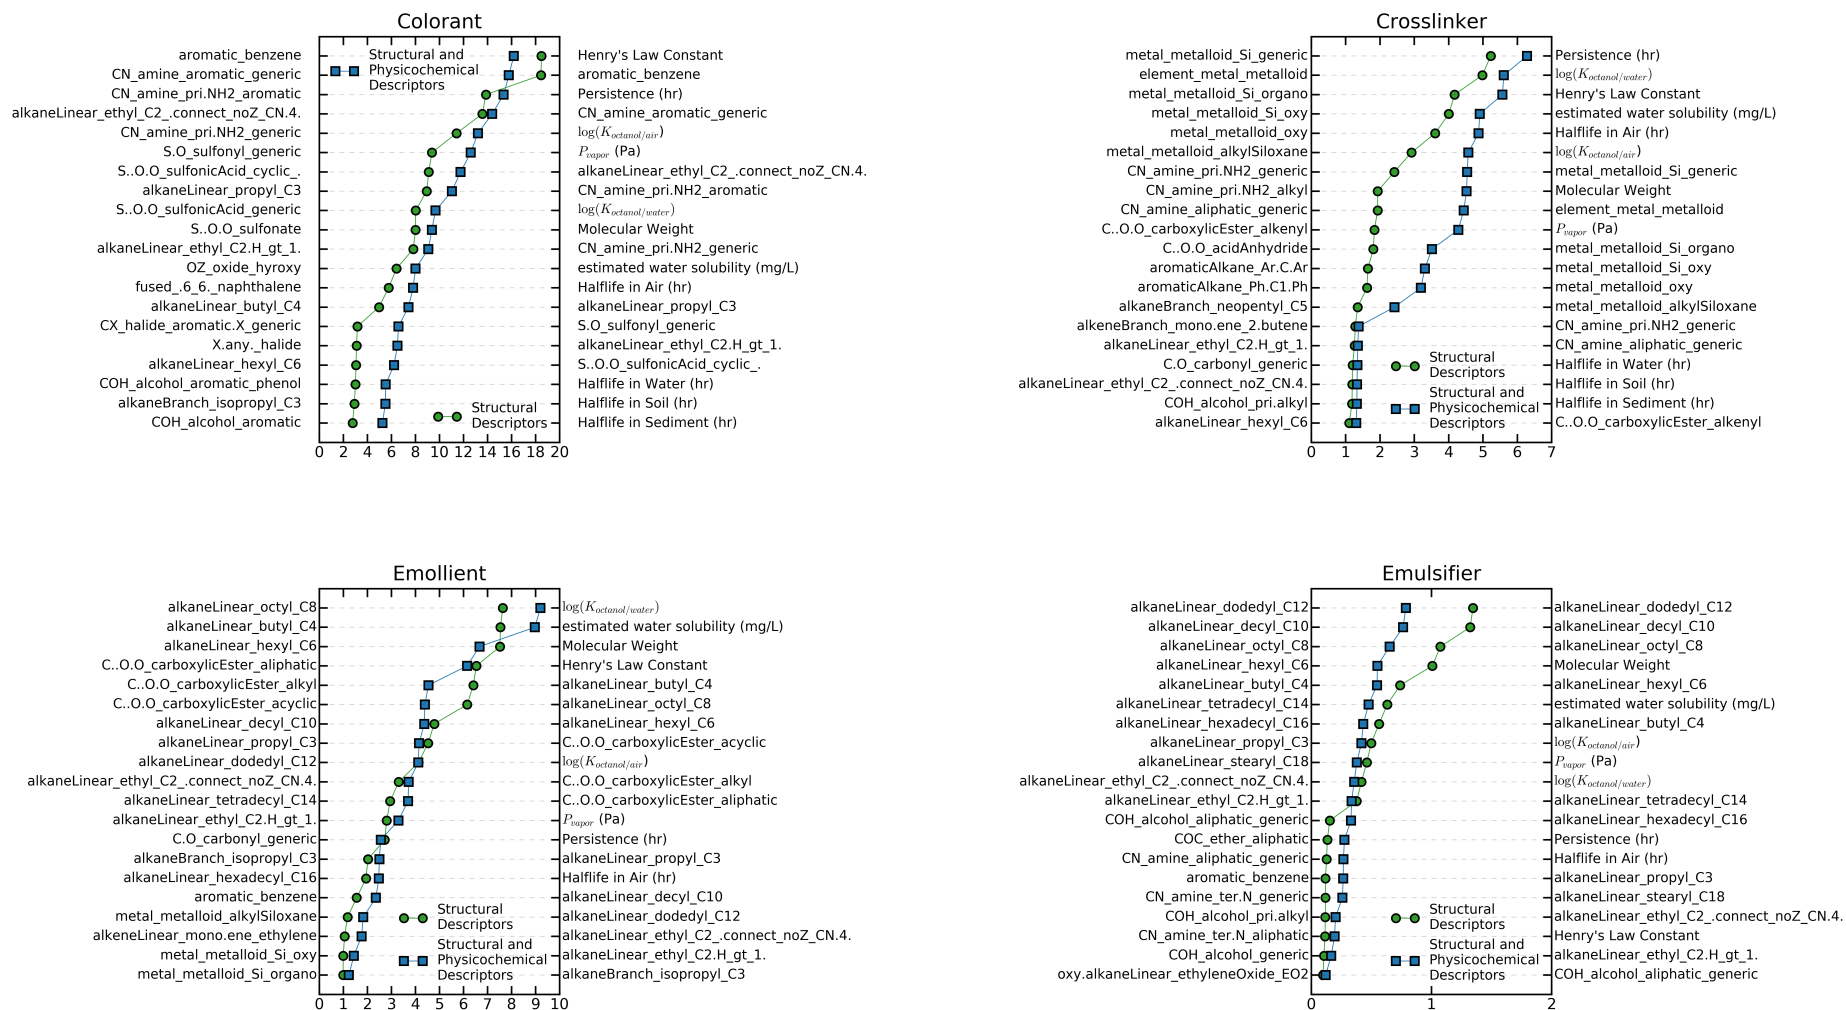

SI Figure 3: Most important variables for colorant, crosslinker, emollient, and emulsifier QSUR models.

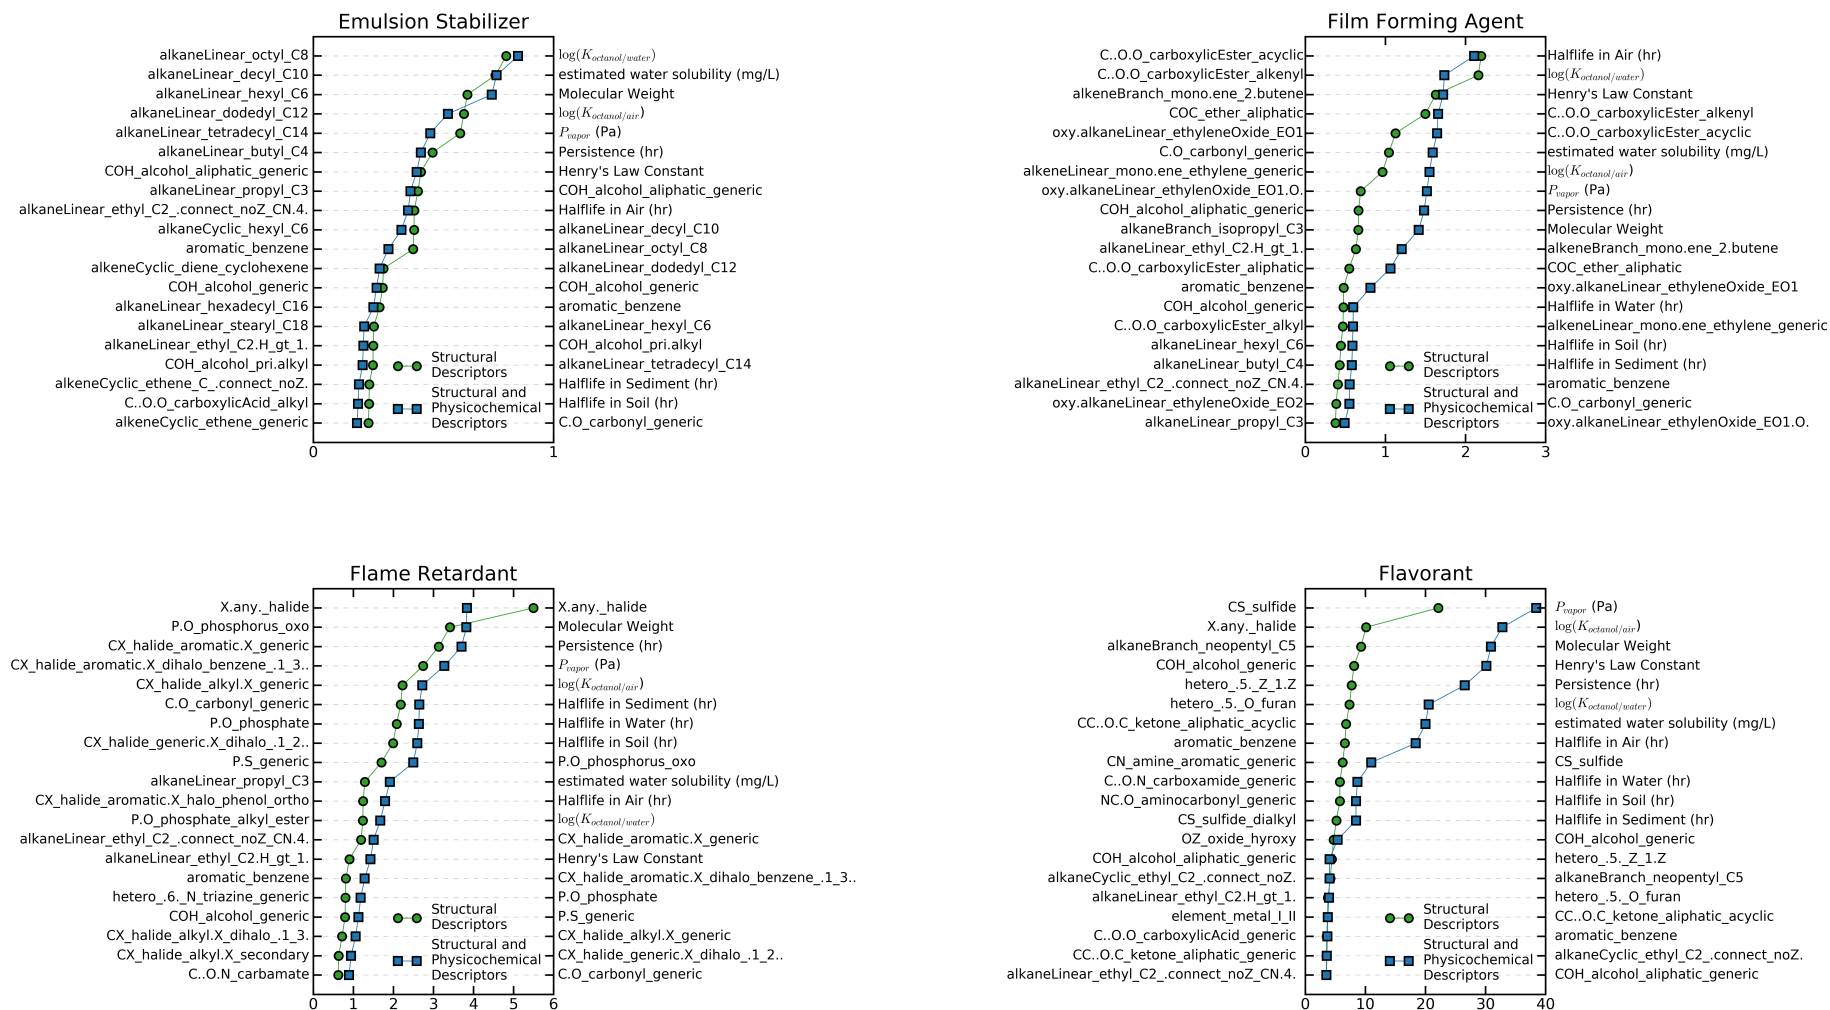

SI Figure 4: Most important variables for emulsion stabilizer, film forming agent, flame retardant, and flavorant QSUR models.

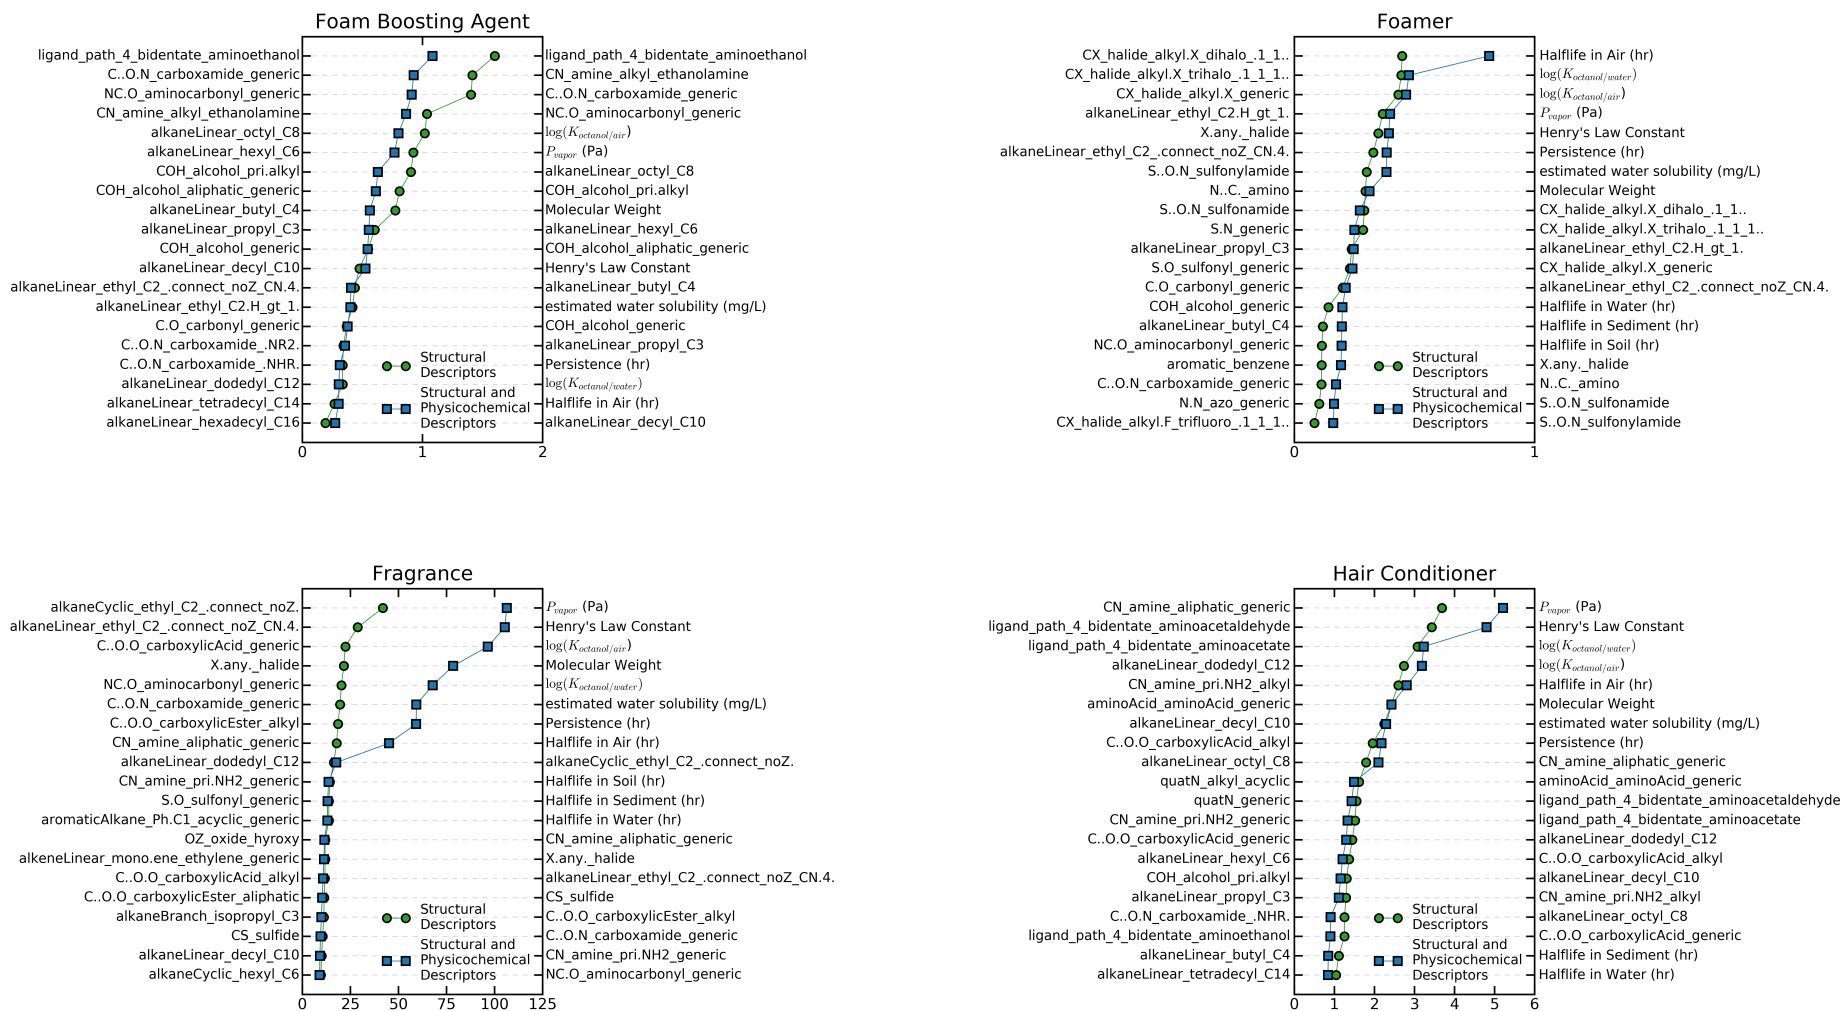

SI Figure 5: Most important variables for foam boosting agent, foamer, fragrance, and hair conditioner QSUR models.

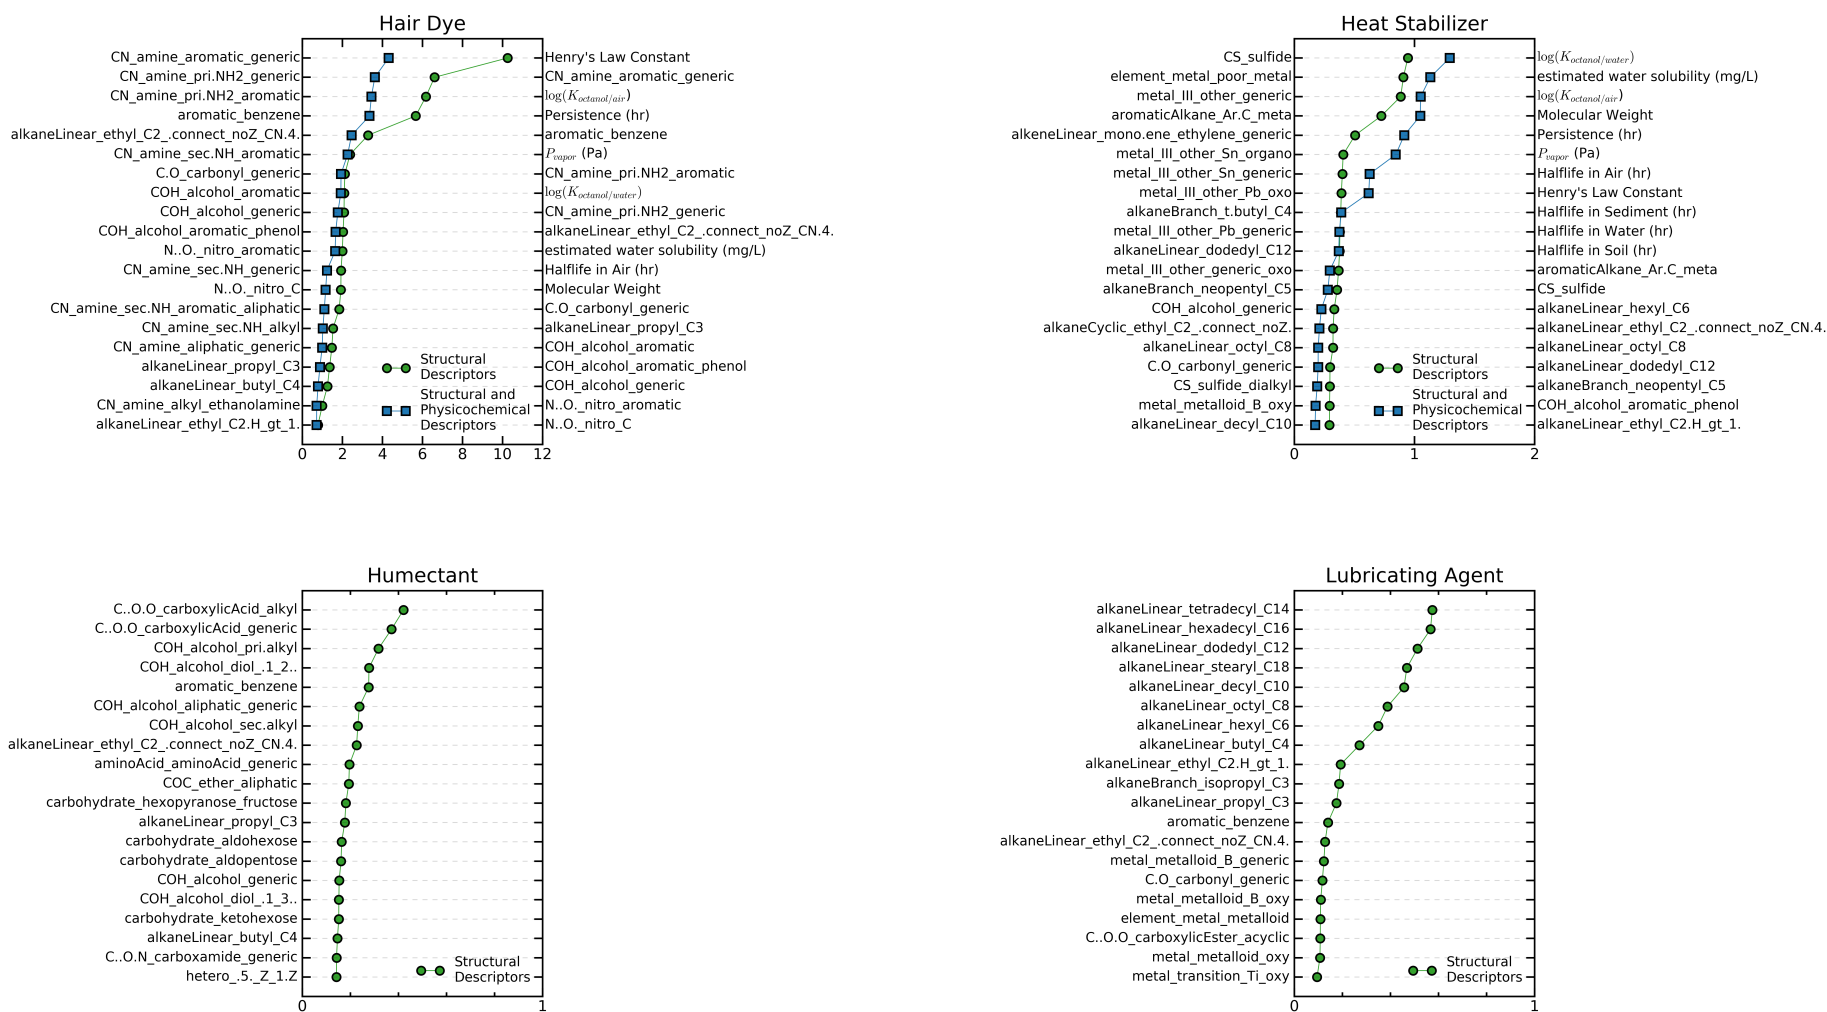

SI Figure 6: Most important variables for hair dye, heat stabilizer, humectant, and lubricating agent QSUR models.

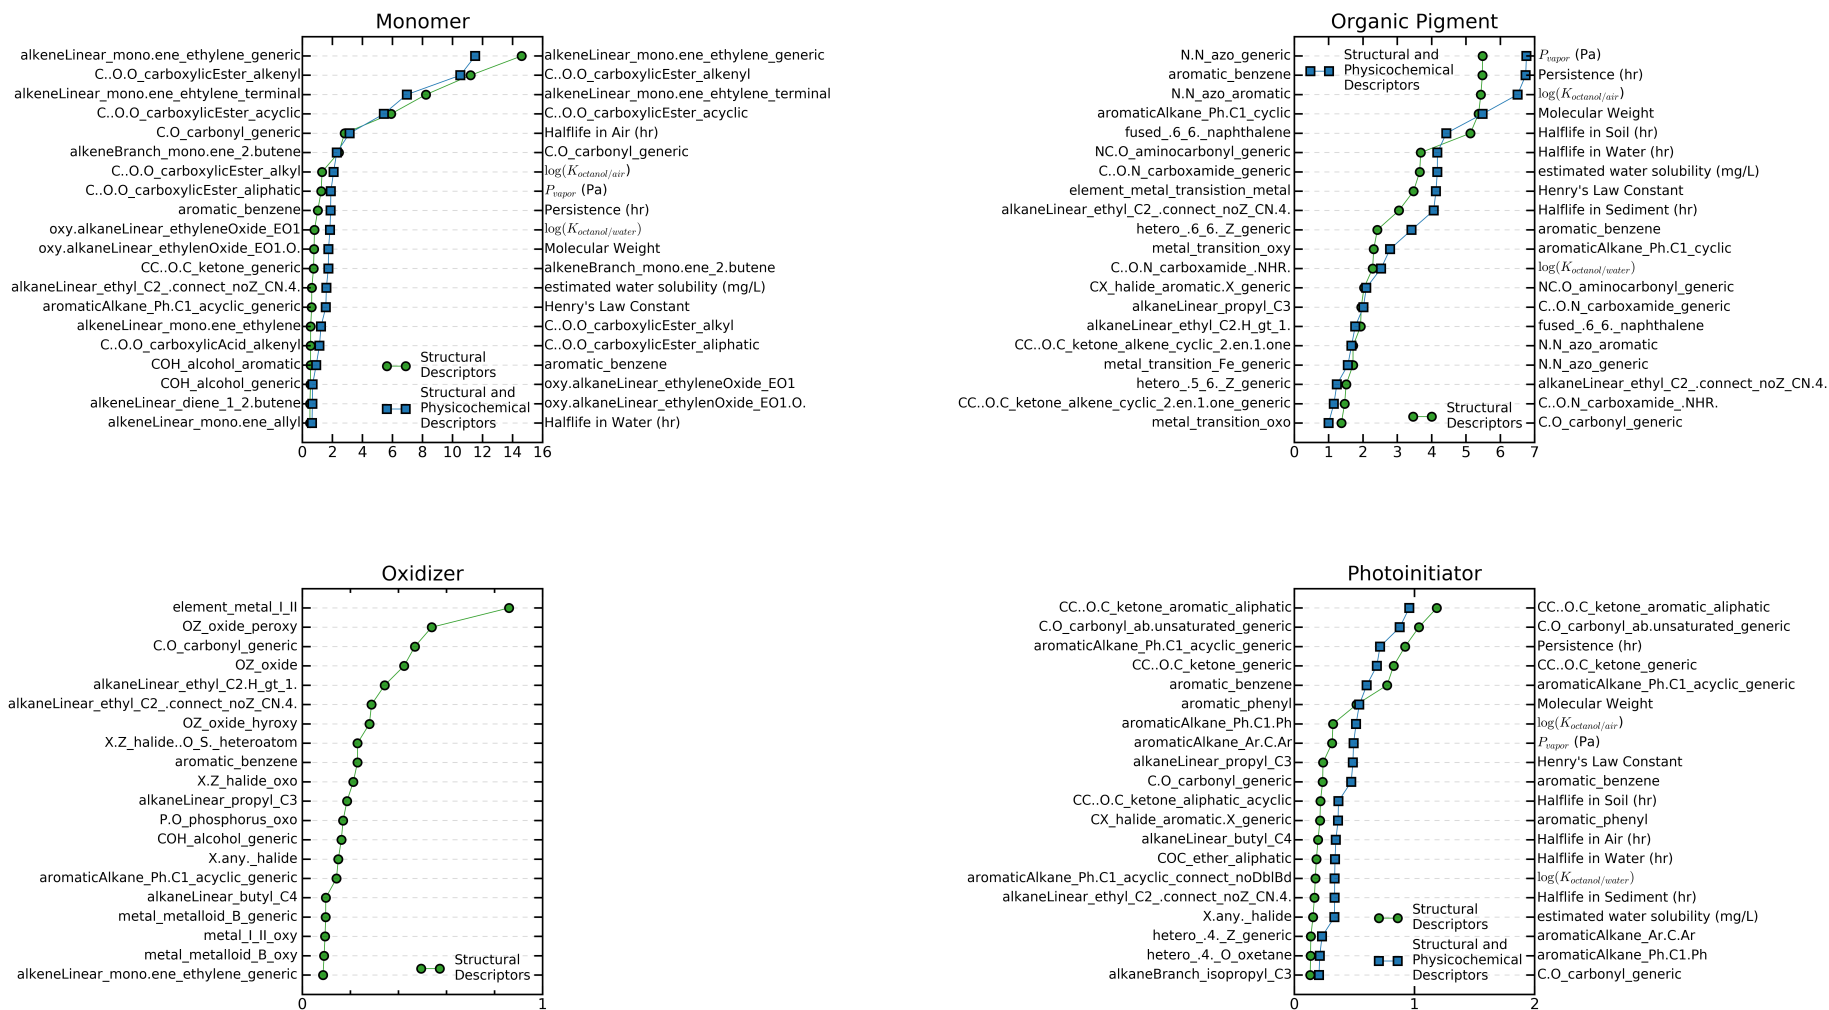

SI Figure 7: Most important variables for valid monomer, organic pigment, oxidizer, and photoinitiator QSUR models.

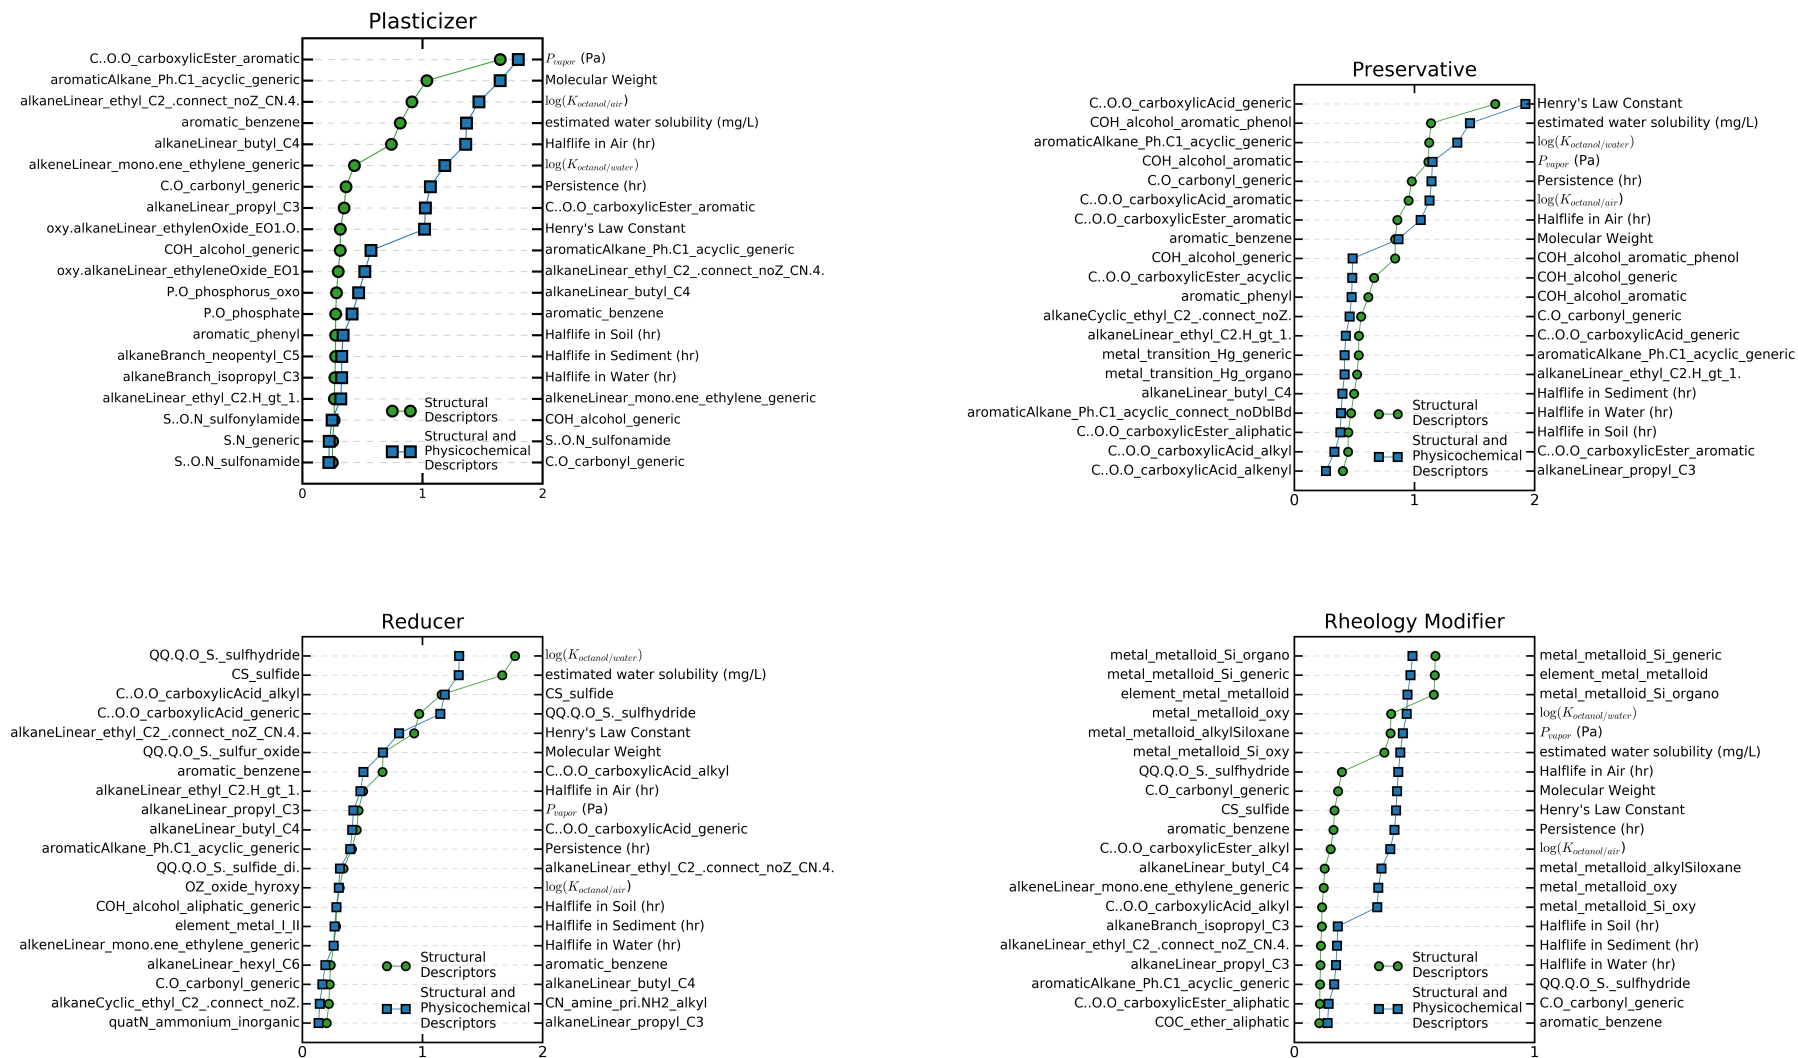

SI Figure 8: Most important variables for plasticizer, preservative, reducer, and rheology modifier QSUR models.



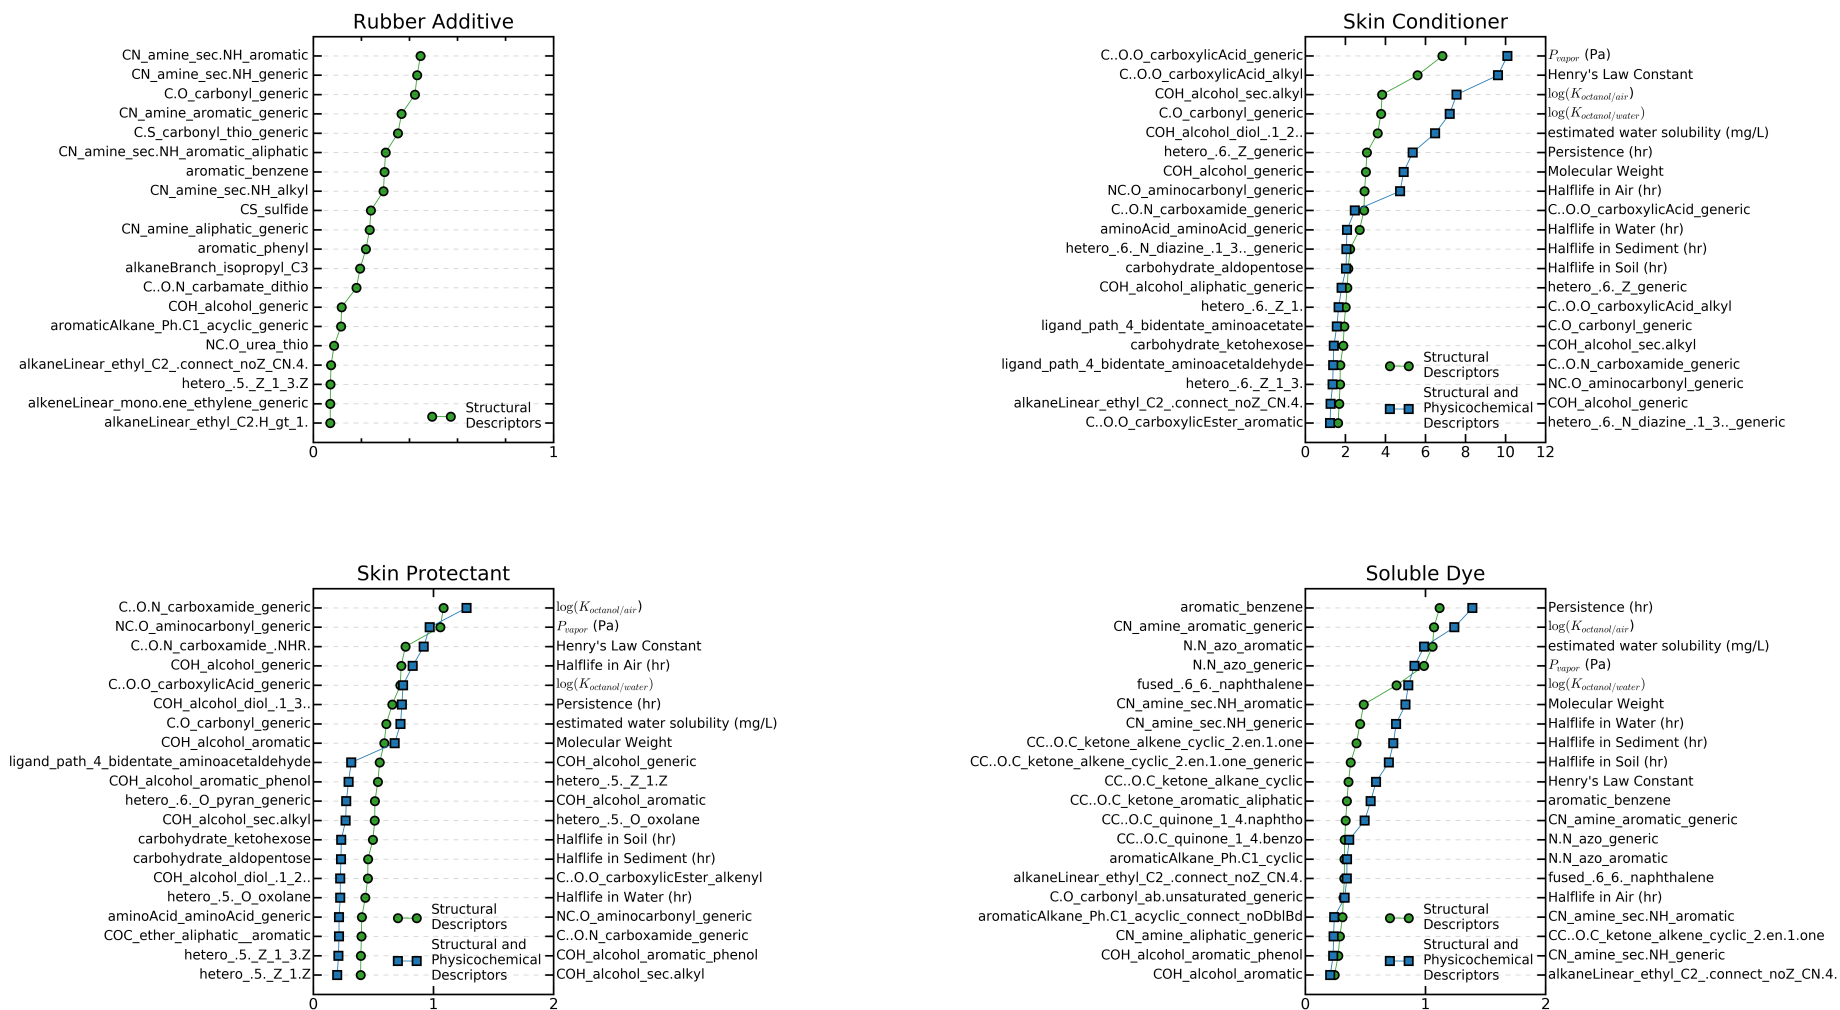

SI Figure 9: Most important variables for rubber additive, skin conditioner, skin protectant, and soluble dye QSUR models.

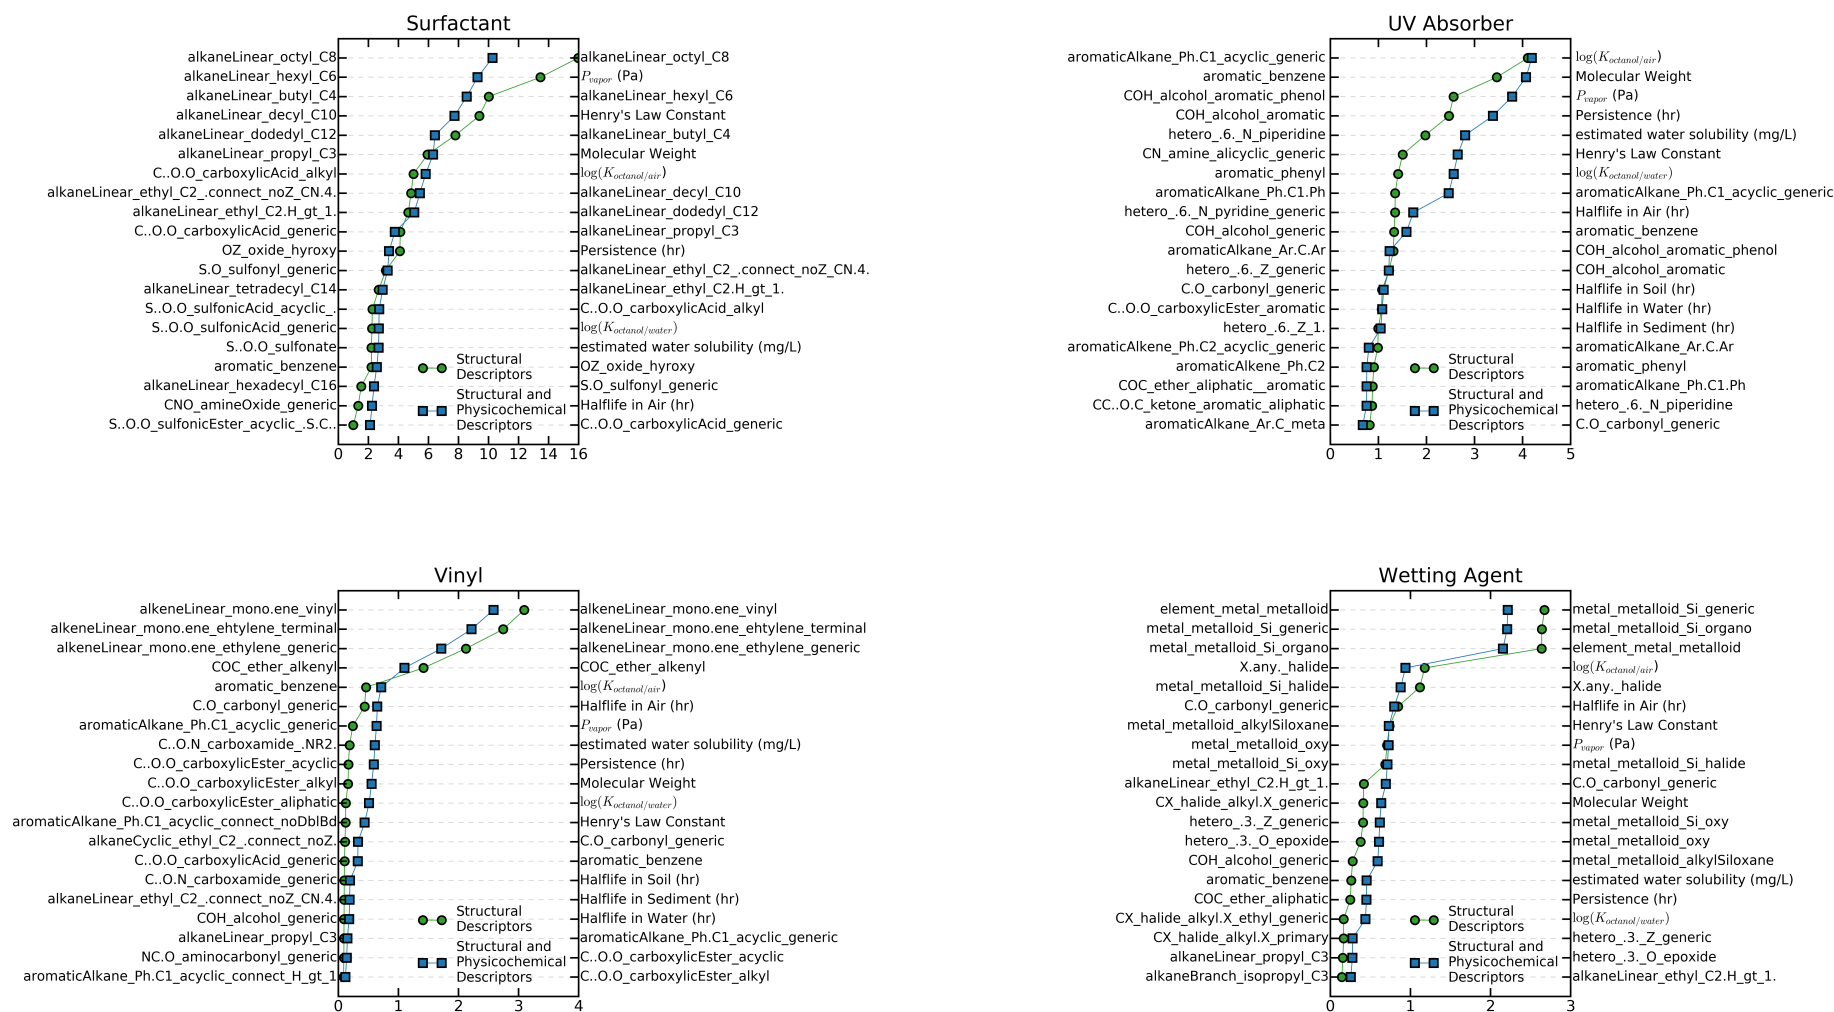

SI Figure 10: Most important variables for surfactant, UV absorber, vinyl, and wetting agent QSUR models.

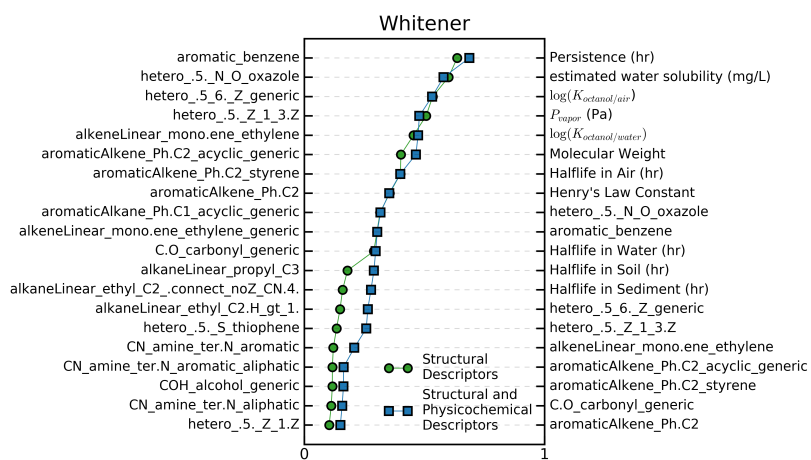

SI Figure 11: Most important variables for whitener QSUR model.
